# Supplementary material for: EPS364, a Novel Deep-Sea Bacterial Exopolysaccharide, Inhibits Liver Cancer Cell Growth and Adhesion
Source: PubMed Central journal article supplement (PMC8004136; doi:10.3390/md19030171), 2021-03-22
Supplement: marinedrugs-19-00171-s001.pdf [file marinedrugs-19-00171-s001.pdf]

Table S1. Primers used for the quantitative real-time PCR amplification

| <b>Primer</b> | <b>Sequence (from 5' to 3')</b> |
|---------------|---------------------------------|
| ALCAM-F       | CCTTGCCGACTTGACGTACC            |
| ALCAM-R       | TGCCTCAAACACGTTGTCCT            |
| ICAM1-F       | GAACCCATTGCCCGAGCTCA            |
| ICAM1-R       | TGACAGTCACTGATTCCCCGAT          |
| CTNNB1-F      | TGTTAAATTCTTGGTATTACGACA        |
| CTNNB1-R      | CCACCACTAGCCAGTATGATGA          |
| CAV-1-F       | TTCTGGGCTTCATCTGGCAAC           |
| CAV-1-R       | GCTCAGCCCTATTGGTCCACTTTA        |
| CAV-2-F       | CACCCTCAGCTGTCTGCACAT           |
| CAV-2-R       | GGCAGAACCATTAGGCAGGTCTT         |
| GAPDH-F       | GCACCGTCAAGGCTGAGAAC            |
| GAPDH-R       | TGGTGAAGACGCCAGTGGA             |
| CDH2-F        | CGAATGGATGAAAGACCCATCC          |
| CDH2-R        | GCCACTGCCTTCATAGTCAAACACT       |
| ALP-F         | AGCTTGGTGGTGGATGAAAC            |
| ALP-R         | TCTTGCTTCATCGTTTGCAG            |
| KLB-F         | GCAGTCAGACCCAAGAAAATACAGA       |
| KLB-R         | CCCAGGAATATCAGTGGTTTCTTC        |
| FGFR4-F       | TCAAGCTCATCCCTGGTACG            |
| FGFR4-R       | GCCACAGTGCTGGCTTGGTCAG          |
| FGFR19-F      | GGAGATCCGCCAGATGGCTAC           |
| FGFR19-R      | GGCCTCCAGTCCGGTGACAAGC          |
